# Supplementary material
Source: PubMed Central journal article supplement (PMC5385416)
Supplement: Supp_Table1.pdf [file Supp_Table1.pdf]

## Supplementary Data

SUPPLEMENTAL TABLE S1. COMPARISON OF MALE AND FEMALE SERVICE MEMBERS COMPLETING THE INITIAL VS. BOTH INITIAL AND FOLLOW-UP QUESTIONNAIRES ON DEMOGRAPHICS, DEPLOYMENT, AND MENTAL HEALTH ISSUES<sup>a</sup>

| <i>Characteristics<sup>b</sup></i>                                      | <i>Army active duty service members</i>                |                                   |                                                      |                                  |
|-------------------------------------------------------------------------|--------------------------------------------------------|-----------------------------------|------------------------------------------------------|----------------------------------|
|                                                                         | <i>Completed initial questionnaire<br/>n = 333,803</i> |                                   | <i>Completed both questionnaires<br/>n = 276,100</i> |                                  |
|                                                                         | <i>Males<br/>299,763 (89.8%)</i>                       | <i>Females<br/>34,040 (10.2%)</i> | <i>Males<br/>240,694 (90.1%)</i>                     | <i>Females<br/>26,406 (9.9%)</i> |
| <b>Dependent variable</b>                                               |                                                        |                                   |                                                      |                                  |
| Frequent binge drinking (from initial questionnaire)                    | 17.7%                                                  | 6.6%                              | 18.0%                                                | 6.8%                             |
| <i>Demographic</i>                                                      |                                                        |                                   |                                                      |                                  |
| <b>Age (years)</b>                                                      |                                                        |                                   |                                                      |                                  |
| 17–24                                                                   | 46.0%                                                  | 44.9%                             | 46.5%                                                | 45.2%                            |
| 25–29                                                                   | 24.3%                                                  | 24.8%                             | 24.3%                                                | 24.9%                            |
| 30–39                                                                   | 23.5%                                                  | 23.1%                             | 23.4%                                                | 22.9%                            |
| 40+                                                                     | 6.2%                                                   | 7.3%                              | 5.8%                                                 | 7.0%                             |
| <b>Race</b>                                                             |                                                        |                                   |                                                      |                                  |
| White, non-Hispanic                                                     | 55.5%                                                  | 33.7%                             | 55.5%                                                | 34.0%                            |
| Black, non-Hispanic                                                     | 15.9%                                                  | 35.2%                             | 15.7%                                                | 34.4%                            |
| Asian/Pacific Islander                                                  | 15.3%                                                  | 14.8%                             | 15.5%                                                | 15.0%                            |
| American Indian/Alaskan Native                                          | 0.9%                                                   | 1.5%                              | 0.9%                                                 | 1.5%                             |
| Hispanic                                                                | 11.1%                                                  | 12.7%                             | 11.2%                                                | 12.8%                            |
| Other/unknown                                                           | 1.3%                                                   | 2.2%                              | 1.4%                                                 | 2.2%                             |
| <b>Marital status</b>                                                   |                                                        |                                   |                                                      |                                  |
| Never married                                                           | 37.0%                                                  | 41.6%                             | 37.0%                                                | 42.1%                            |
| Married                                                                 | 58.8%                                                  | 45.2%                             | 58.8%                                                | 44.8%                            |
| Divorced                                                                | 4.0%                                                   | 12.4%                             | 3.9%                                                 | 12.3%                            |
| Other                                                                   | 0.3%                                                   | 0.8%                              | 0.3%                                                 | 0.8%                             |
| <b>Any child dependent eligible for Military Health System benefits</b> |                                                        |                                   |                                                      |                                  |
| Yes                                                                     | 45.5%                                                  | 38.7%                             | 45.4%                                                | 38.2%                            |
| No                                                                      | 54.5%                                                  | 61.4%                             | 54.6%                                                | 61.8%                            |
| <b>Rank, pay grade</b>                                                  |                                                        |                                   |                                                      |                                  |
| Junior enlisted (E1-E4)                                                 | 55.6%                                                  | 53.3%                             | 56.1%                                                | 53.6%                            |
| Senior enlisted (E5-E9)                                                 | 31.3%                                                  | 28.9%                             | 31.3%                                                | 28.8%                            |
| Officers                                                                | 13.1%                                                  | 17.8%                             | 12.6%                                                | 17.6%                            |
| <b>Education</b>                                                        |                                                        |                                   |                                                      |                                  |
| Less than college degree                                                | 86.6%                                                  | 79.2%                             | 87.2%                                                | 79.3%                            |
| College degree                                                          | 13.4%                                                  | 20.8%                             | 12.8%                                                | 20.7%                            |
| <b>Occupation Specialty</b>                                             |                                                        |                                   |                                                      |                                  |
| Combat specialist                                                       | 35.0%                                                  | 3.7%                              | 35.0%                                                | 3.7%                             |
| Health care                                                             | 5.6%                                                   | 15.5%                             | 5.7%                                                 | 16.3%                            |
| Functional support, service, and supply                                 | 22.0%                                                  | 54.3%                             | 21.8%                                                | 53.6%                            |
| Mechanical, electrical, engineering                                     | 20.8%                                                  | 14.3%                             | 21.3%                                                | 14.4%                            |
| Other                                                                   | 16.6%                                                  | 12.2%                             | 16.3%                                                | 12.0%                            |
| <i>Deployment</i>                                                       |                                                        |                                   |                                                      |                                  |
| <b>Length of index deployment (months)</b>                              |                                                        |                                   |                                                      |                                  |
| 1–11                                                                    | 36.2%                                                  | 38.8%                             | 34.3%                                                | 36.8%                            |
| 12                                                                      | 33.9%                                                  | 32.8%                             | 33.7%                                                | 32.4%                            |
| >12                                                                     | 29.9%                                                  | 28.4%                             | 32.1%                                                | 30.9%                            |
| <b>Fiscal year of end of index deployment</b>                           |                                                        |                                   |                                                      |                                  |
| 2008                                                                    | 7.0%                                                   | 7.1%                              | 7.1%                                                 | 7.0%                             |
| 2009                                                                    | 36.8%                                                  | 34.8%                             | 39.6%                                                | 38.6%                            |
| 2010                                                                    | 32.5%                                                  | 34.8%                             | 39.3%                                                | 38.5%                            |
| 2011                                                                    | 20.2%                                                  | 23.4%                             | 14.0%                                                | 15.8%                            |

(continued)

SUPPLEMENTARY TABLE S1. (CONTINUED)

| Characteristics <sup>b</sup>                                  | Army active duty service members               |                           |                                              |                          |
|---------------------------------------------------------------|------------------------------------------------|---------------------------|----------------------------------------------|--------------------------|
|                                                               | Completed initial questionnaire<br>n = 333,803 |                           | Completed both questionnaires<br>n = 276,100 |                          |
|                                                               | Males<br>299,763 (89.8%)                       | Females<br>34,040 (10.2%) | Males<br>240,694 (90.1%)                     | Females<br>26,406 (9.9%) |
| Any prior deployment to index                                 |                                                |                           |                                              |                          |
| Has a prior deployment                                        | 46.7%                                          | 35.9%                     | 46.3%                                        | 35.8%                    |
| Does not have a prior deployment                              | 53.3%                                          | 64.1%                     | 53.7%                                        | 64.2%                    |
| Combat Exposure Score                                         |                                                |                           |                                              |                          |
| 0                                                             | 57.0%                                          | 70.8%                     | 57.4%                                        | 71.3%                    |
| 1                                                             | 21.8%                                          | 21.5%                     | 21.8%                                        | 21.3%                    |
| 2                                                             | 12.8%                                          | 6.9%                      | 12.7%                                        | 6.8%                     |
| 3                                                             | 8.3%                                           | 0.8%                      | 8.2%                                         | 0.7%                     |
| Wounded, injured, assaulted or hurt on most recent deployment |                                                |                           |                                              |                          |
| Yes                                                           | 17.0%                                          | 16.7%                     | 16.7%                                        | 16.6%                    |
| No                                                            | 83.0%                                          | 83.3%                     | 83.3%                                        | 83.4%                    |
| TBI Positive Screen                                           |                                                |                           |                                              |                          |
| Yes                                                           | 7.7%                                           | 4.5%                      | 7.5%                                         | 4.4%                     |
| No                                                            | 92.3%                                          | 95.5%                     | 92.5%                                        | 95.6%                    |
| <i>Post-deployment mental health</i>                          |                                                |                           |                                              |                          |
| PC-PTSD positive                                              |                                                |                           |                                              |                          |
| Yes                                                           | 5.6%                                           | 6.0%                      | 5.3%                                         | 5.7%                     |
| No                                                            | 94.4%                                          | 94.0%                     | 94.7%                                        | 94.3%                    |
| Depression (PHQ-2) positive                                   |                                                |                           |                                              |                          |
| Yes                                                           | 7.5%                                           | 9.2%                      | 7.4%                                         | 8.9%                     |
| No                                                            | 92.5%                                          | 90.8%                     | 92.6%                                        | 91.1%                    |
| Harmful thoughts                                              |                                                |                           |                                              |                          |
| Yes                                                           | 1.5%                                           | 1.9%                      | 1.5%                                         | 1.8%                     |
| No                                                            | 98.5%                                          | 98.1%                     | 98.5%                                        | 98.2%                    |
| Any mental health <sup>c</sup> positive screen                |                                                |                           |                                              |                          |
| Yes                                                           | 11.7%                                          | 13.5%                     | 11.5%                                        | 13.1%                    |
| No                                                            | 88.3%                                          | 86.5%                     | 88.6%                                        | 86.9%                    |
| <i>Key independent variable</i>                               |                                                |                           |                                              |                          |
| TBI positive screen only                                      | 5.2%                                           | 3.0%                      | 5.1%                                         | 2.9%                     |
| Mental health positive screen only                            | 9.2%                                           | 11.9%                     | 9.1%                                         | 11.6%                    |
| Both TBI and mental health positive screens                   | 2.5%                                           | 1.6%                      | 2.4%                                         | 1.4%                     |
| Neither                                                       | 83.1%                                          | 83.5%                     | 83.4%                                        | 84.0%                    |

<sup>a</sup>The initial questionnaire was completed within 60 days of the deployment end date, and the follow-up questionnaire was completed 30–300 days after the end of the index deployment.

<sup>b</sup>Percent distributions may not add up to 100% due to rounding.

<sup>c</sup>Any positive mental health is defined as a positive screen for post-traumatic stress disorder, depression, and/or harmful thoughts.

TBI, traumatic brain injury; PC-PTSD, Primary Care–Post-Traumatic Stress Disorder screen; PHQ-2, two-item Patient Health Questionnaire.
